# Supplementary material
Source: PubMed Central journal article supplement (PMC9492644)

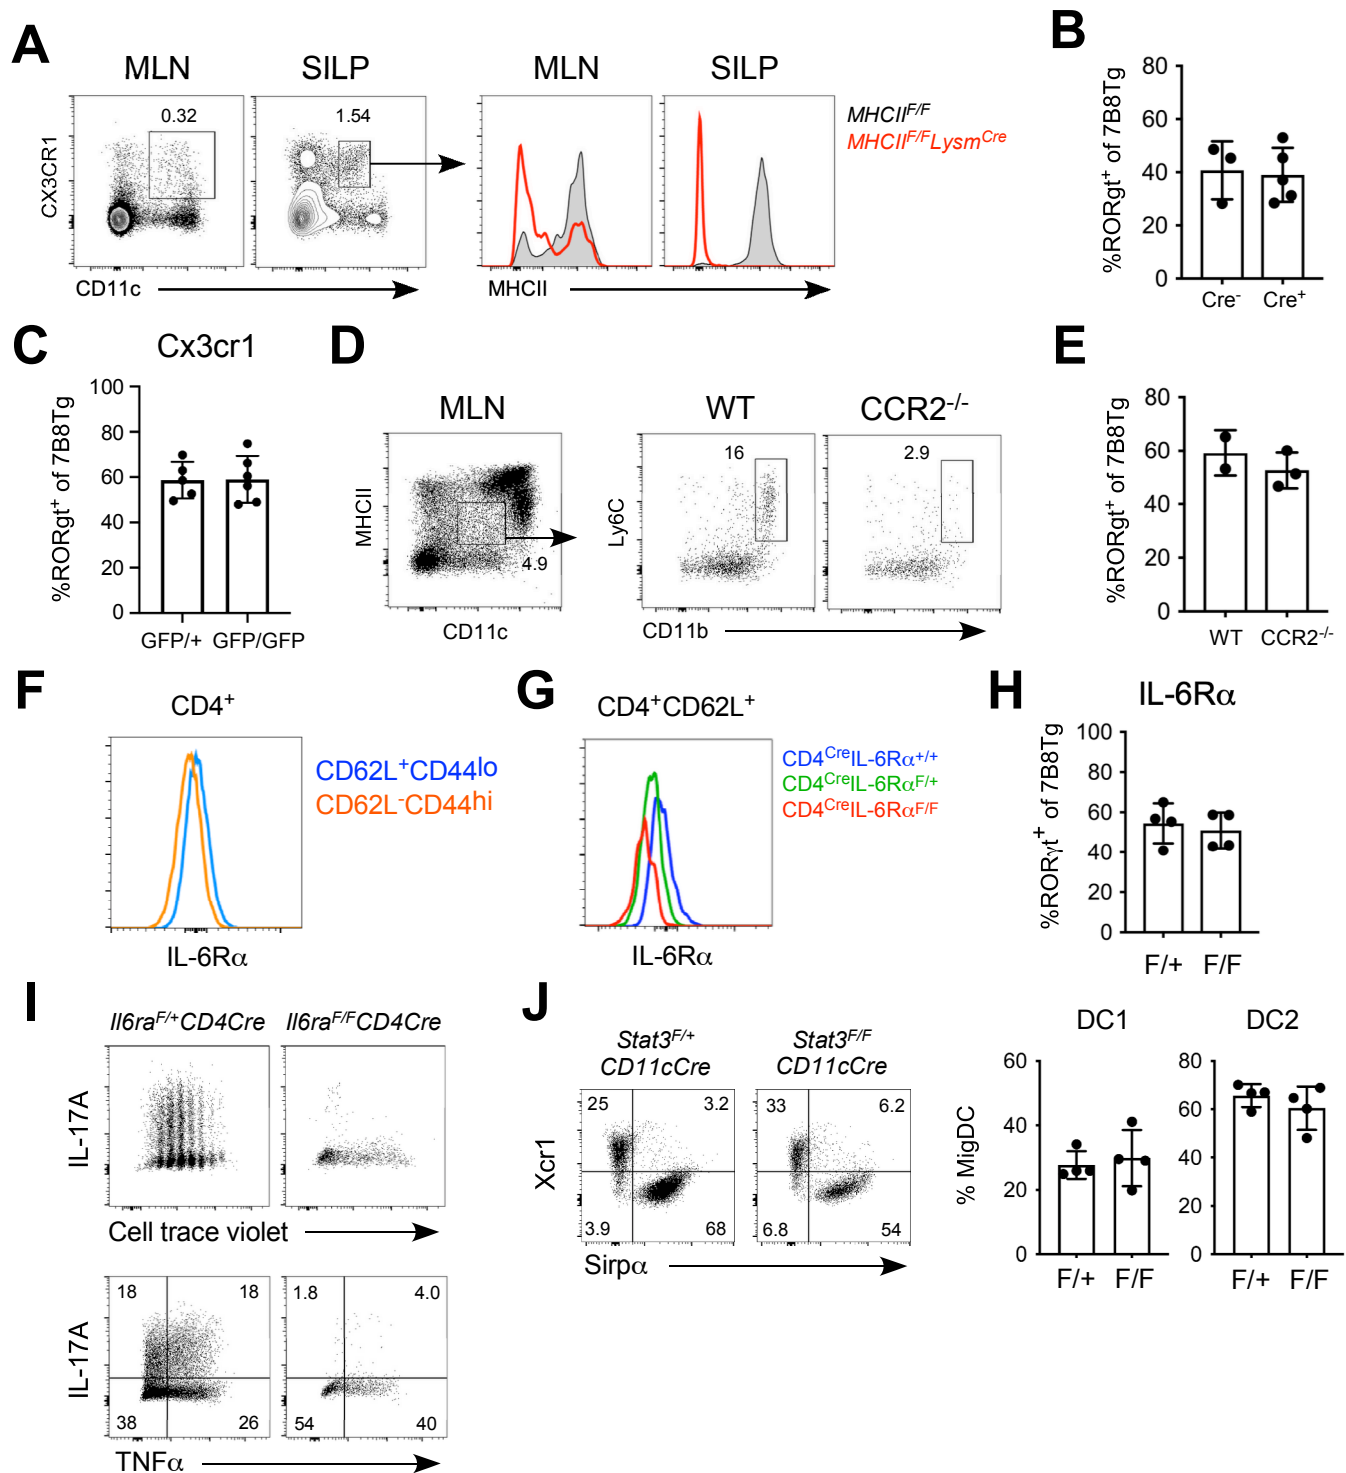

**Figure S1. Macrophages and T cell-intrinsic IL-6R expression are not essential in MLN Th17 priming.** (A) Loss of MHCII expression on CX3CR1<sup>+</sup> macrophages in MHCII<sup>fl/fl</sup>Lysm<sup>Cre</sup> mice. (B) 7B8Tg activation in the MLN of MHCII<sup>fl/fl</sup>Lysm<sup>Cre</sup> mice on day 3 post adoptive transfer. (C) 7B8Tg activation in the MLN of CX3CR1<sup>gfp/gfp</sup> mice on day 3 post adoptive transfer. (D) Loss of monocytes in CCR2<sup>-/-</sup> mice. (E) 7B8Tg activation in the MLN of CCR2<sup>-/-</sup> mice on day 3 post adoptive transfer. (F) IL-6Rα expression on MLN CD4 T cells. (G) Loss of IL-6Rα expression on MLN CD4 T cells in IL-6Rα<sup>fl/fl</sup>CD4<sup>Cre</sup> 7B8Tg mice. (H) IL-6Rα<sup>fl/fl</sup>CD4<sup>Cre</sup> 7B8Tg activation in the MLN of C57BL/6 mice on day 3 post adoptive transfer. (I) Requirement for IL-6Rα expression by *in vitro* differentiated Th17 cells. Naïve IL-6Rα<sup>fl/fl</sup>CD4<sup>Cre</sup> 7B8Tg cells were activated by plate-bound anti-CD3e/anti-CD28 in the presence of IL-6 and TGFβ with fresh media and cytokines every 3 days. One week later, cells were restimulated with PMA and ionomycin in the presence of brefeldin A and stained for intracellular cytokines. (J) Normal distribution of DC1 and DC2 in the MLN of Stat3<sup>fl/fl</sup>CD11c<sup>Cre</sup> mice. Data shown are representative of 2 independent experiments with 2-4 mice in each group, error bars indicate SEM.

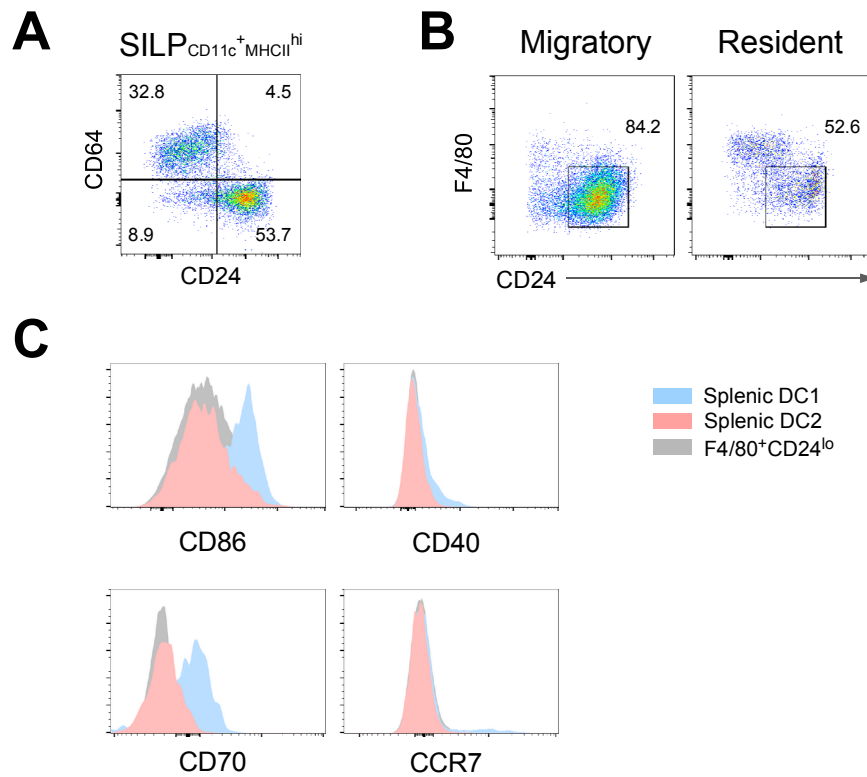

**Figure S2. DCs versus macrophages flow cytometry gating scheme and expression of costimulation receptors. (A)** In the small intestine, CD24<sup>hi</sup> cells represent DCs whereas CD64<sup>hi</sup> cells represent macrophages. **(B)** In the MLN, CD24 expression distinguished DCs from F4/80<sup>+</sup> macrophages. **(C)** Expression of costimulation and migration markers on splenic DCs and

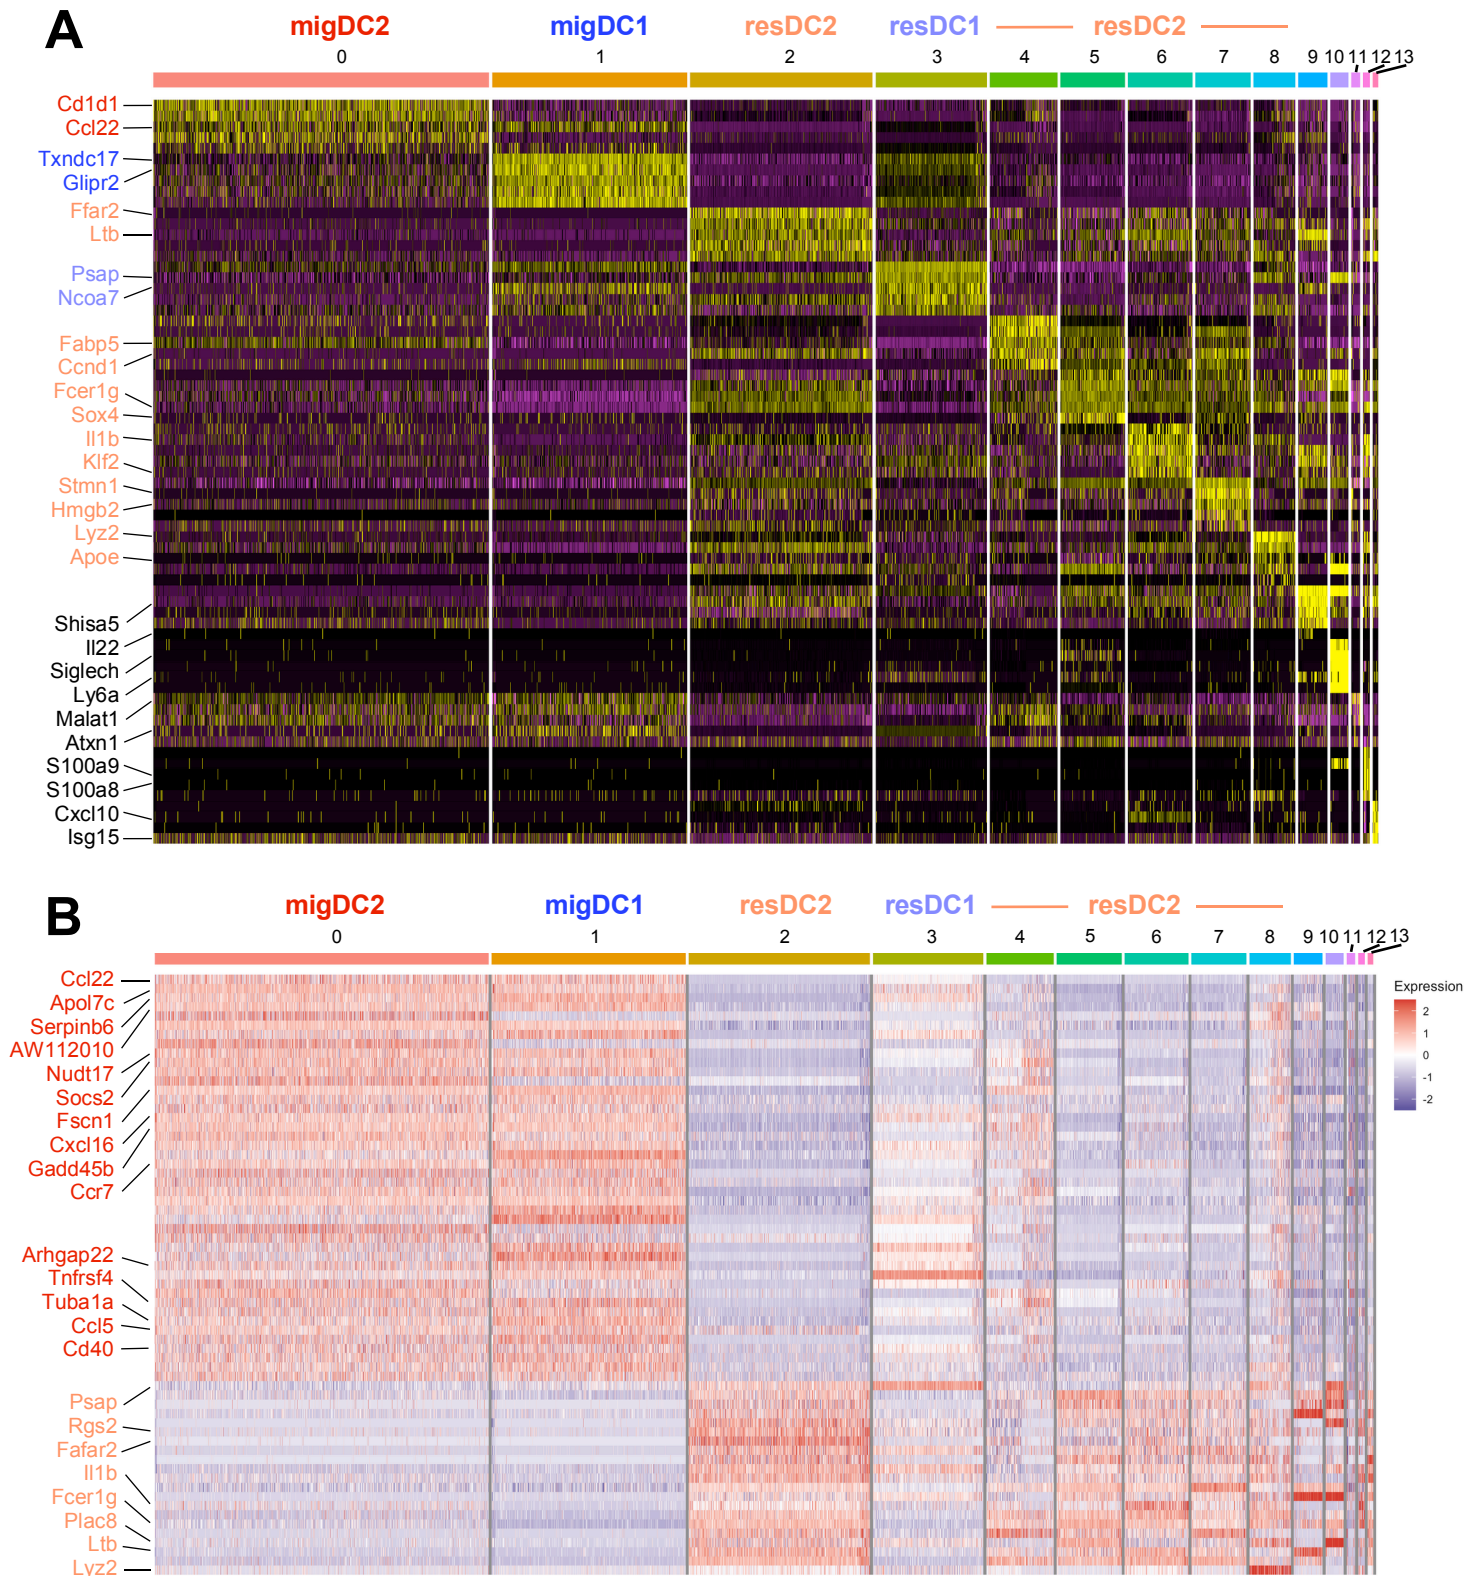

**Figure S3. Integrated analysis of MLN migratory and resident DCs from SFB acutely colonized C57BL/6 mice. (A) Unique markers of migratory DC2s, migratory DC1s, resident DC2s and resident DC1s. (B) Unique markers of migratory DC2s versus resident DC2s.**

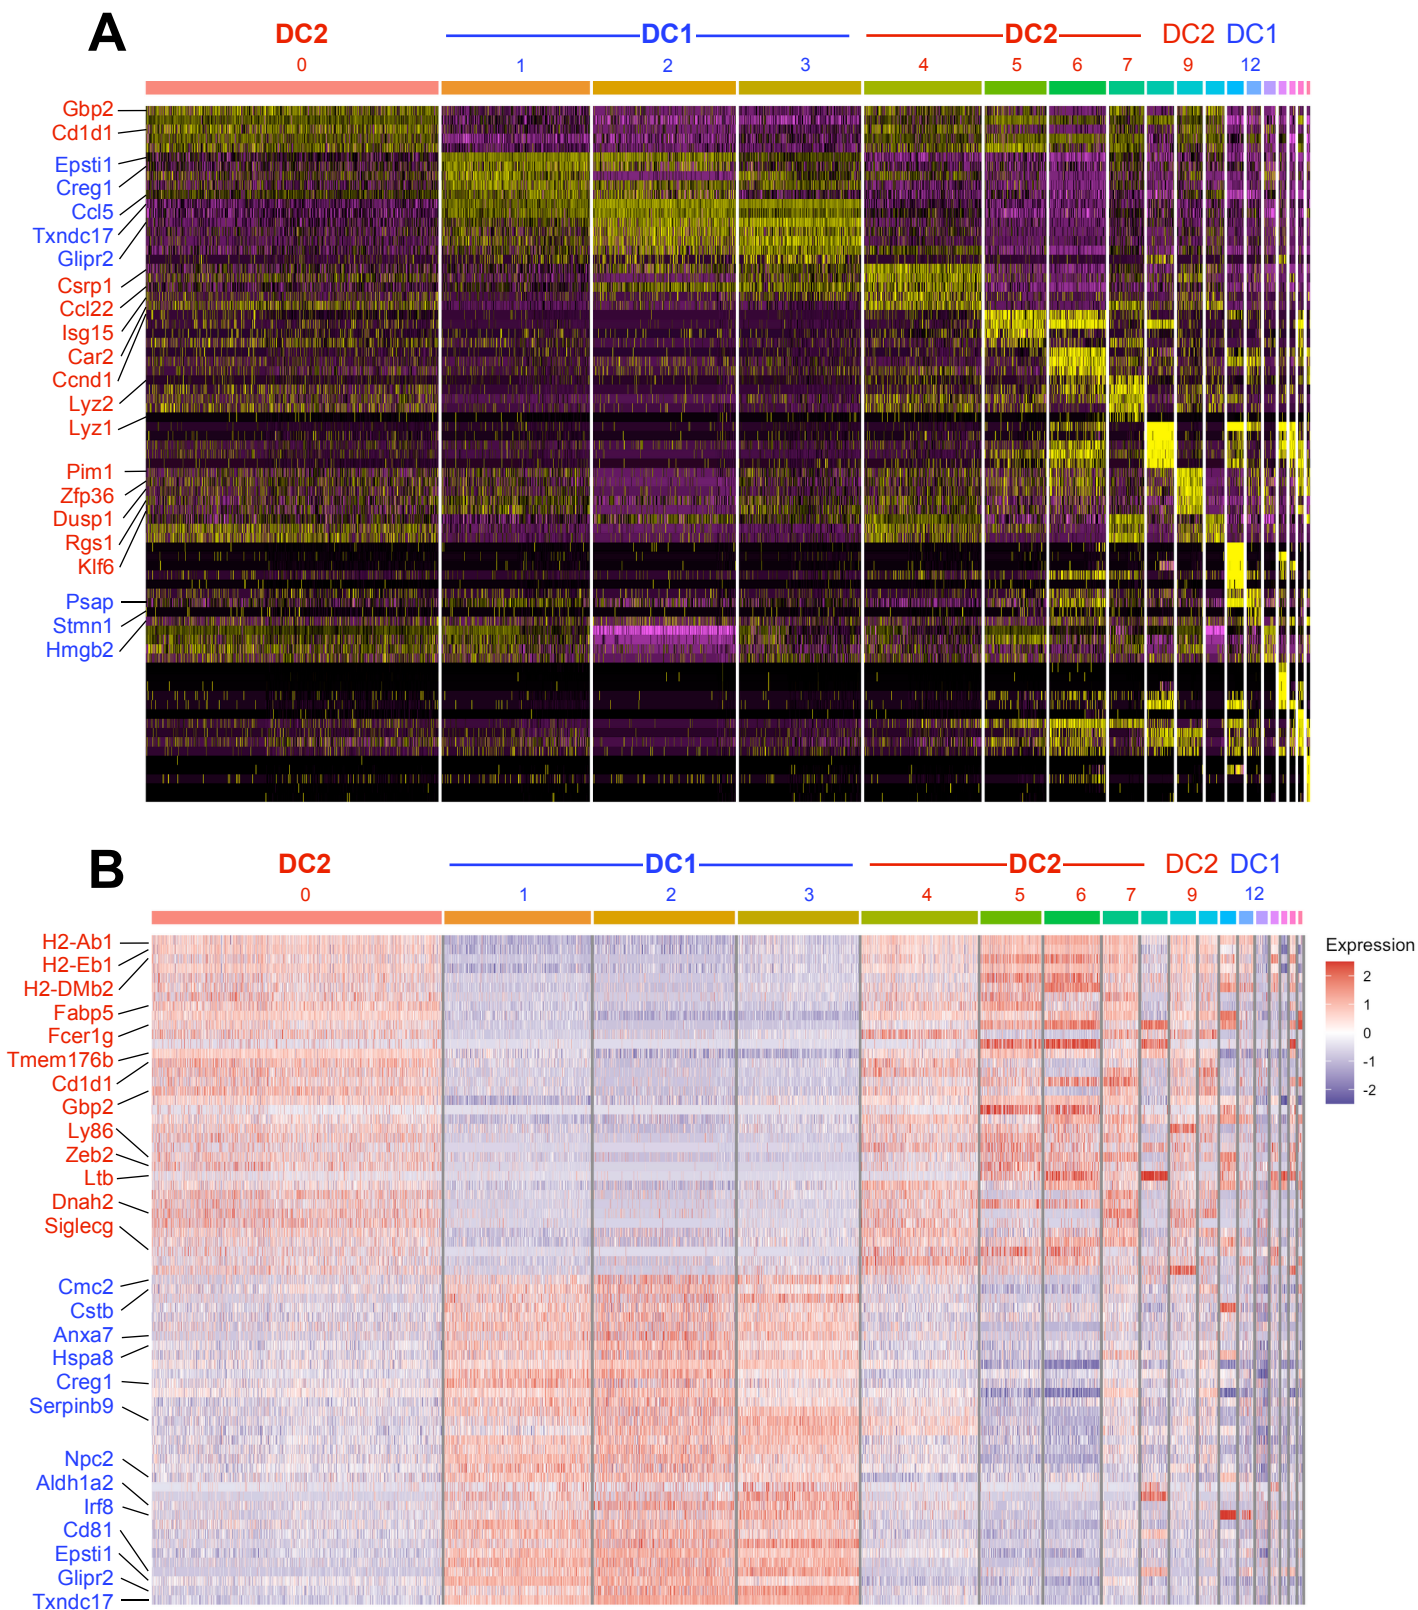

Supplement: NIHMS1824349-supplement-1.pdf [file NIHMS1824349-supplement-1.pdf]
